# Supplementary material for: Donor–acceptor dyes with fluorine substituted phenylene spacer for dye-sensitized solar cells
Source: Royal Society of Chemistry journal article supplement (doi:10.1039/c0jm02433c), 2010-12-03
Supplement: c0jm02433c.pdf [file c0jm02433c.pdf]

## Supporting Information

### Donor-Acceptor Dyes with Fluorine Substituted Phenylene Spacer for Dye-Sensitized Solar Cells

Bo-So Chen,<sup>a</sup> Dong-Yi Chen,<sup>a</sup> Chao-Ling Chen,<sup>b</sup> Che-Wei Hsu,<sup>b</sup> Hui-Chu Hsu,<sup>b</sup>  
Kuan-Lin Wu,<sup>b</sup> Shih-Hung Liu,<sup>a</sup> Pi-Tai Chou\*<sup>a</sup> and Yun Chi\*<sup>b</sup>

<sup>a</sup> Department of Chemistry, National Taiwan University, Taipei 106, Taiwan. Fax: 886-2-23695208;  
Tel: 886-2-33663894; E-mail: chop@ntu.edu.tw

<sup>b</sup> Department of Chemistry, National Tsing Hua University, Hsinchu 300, Taiwan; Fax: 886-3-5720864;  
Tel: 886-3-5712956; E-mail: ychi@mx.nthu.edu.tw

**Table S1.** Calculated details of electronic transitions with the relative oscillator strengths of the **LJB** dyes.

| Dye                      | State | Excitation<br>single excited state     | E <sub>cal</sub><br>(eV) | λ <sub>cal</sub> (nm) | (f)    |
|--------------------------|-------|----------------------------------------|--------------------------|-----------------------|--------|
| <b>LJB-F<sub>o</sub></b> | S1    | HOMO→LUMO(+90%)                        | 2.16                     | 574.9                 | 0.7411 |
|                          | S2    | HOMO-1→LUMO(+80%),<br>HOMO→LUMO+1(8%)  | 3.00                     | 413.8                 | 0.8111 |
|                          | S3    | HOMO-2→LUMO(+79%),<br>HOMO→LUMO+1(15%) | 3.28                     | 377.5                 | 0.0492 |
| <b>LJB-H</b>             | S1    | HOMO→LUMO(+90%)                        | 2.23                     | 555.3                 | 0.7703 |
|                          | S2    | HOMO-1→LUMO(+81%),<br>HOMO→LUMO+1(7%)  | 3.04                     | 408.5                 | 0.7833 |
|                          | S3    | HOMO-2→LUMO(+66%),<br>HOMO→LUMO+1(26%) | 3.34                     | 371.8                 | 0.0756 |
| <b>LJB-F<sub>m</sub></b> | S1    | HOMO→LUMO(+93%)                        | 2.05                     | 603.7                 | 0.4669 |
|                          | S2    | HOMO-1→LUMO(+87%)                      | 2.91                     | 426.7                 | 0.5799 |
|                          | S3    | HOMO-2→LUMO(+95%)                      | 3.09                     | 400.9                 | 0.0074 |
